# Supplementary material for: Efficacy and Safety of Trifluridine/Tipiracil Treatment in Patients With Metastatic Gastric Cancer Who Had Undergone Gastrectomy: Subgroup Analyses of a Randomized Clinical Trial
Source: PubMed Central journal article supplement — JAMA Oncol. 2019 Oct 10;6(1):e193531. doi: 10.1001/jamaoncol.2019.3531 (PMC6802061; doi:10.1001/jamaoncol.2019.3531), 2019-10-10
Supplement: jamaoncol-6-e193531-s002.pdf [file jamaoncol-6-e193531-s002.pdf]

## Supplementary Online Content

Ilson DH, Tabernero J, Prokharau A, et al. Efficacy and safety of Trifluridine/Tipiracil among patients with metastatic gastric cancer and previous gastrectomy: subgroup analyses of a randomized phase 3 trial. *JAMA Oncol*. Published online October 10, 2019. doi:10.1001/jamaoncol.2019.3531

**eMethods.** Statistical Considerations and Definitions of End Points

**eTable 1.** List of Institutional Review Boards/Ethics Committees in the TAGS Trial

**eTable 2.** Baseline Demographics and Disease Characteristics of Patients Who Had or Had Not Undergone Gastrectomy

**eTable 3.** Supportive Treatment for Hematologic Toxicities in Patients Who Had or Had Not Undergone Gastrectomy

**eTable 4.** Treatment Exposure in Patients Who Had or Had Not Undergone Gastrectomy

**eFigure 1.** Time to Deterioration of ECOG Performance Status Score to 2 or Higher in (A) Patients Who Had Undergone Gastrectomy and (B) Patients Who Had Not Undergone Gastrectomy

**eResults.** Hematologic AEs in FTD/TPI-treated Patients Who Had or Had Not Received Prior Irradiation

This supplementary material has been provided by the authors to give readers additional information about their work.

## **eMethods.** Statistical Considerations and Definitions of Endpoints

Overall survival (OS) was the primary endpoint of this study, defined as the time from the date of randomization to the death date for the intention-to-treat population. In the absence of death confirmation or for patients alive as of the OS cut-off date, the survival time was censored at the date of last study follow-up or the cut-off date, whichever was earlier. The cut-off date for OS was defined by the date of the 384<sup>th</sup> death.

Progression-free survival was defined as the time from the date of randomization until the date of the investigator-assessed radiological disease progression or death due to any cause. Patients who were alive with no disease progression as of the analysis cut-off date were censored at the date of the last tumor assessment. Patients who received non-study cancer treatment before disease progression, or with clinical but not radiologic evidence of progression, were censored at the date of the last evaluable tumor assessment before the non-study cancer treatment was initiated.

The time to deterioration of Eastern Cooperative Oncology Group (ECOG) performance status was defined as the time from randomization to the first date on which an ECOG performance status score of  $\geq 2$  was observed. Patients not reaching an ECOG performance status score of  $\geq 2$  were censored at the last recorded performance status assessment during the study.

Adverse events (AEs) were defined as events that started on or after treatment or started before treatment and worsened after the start of treatment through 30 days after the last dose of study treatment. Verbatim AE terms were coded and classified by system organ class and preferred term according to the Medical Dictionary for Regulatory Activities (MedDRA) version 20.1 terminology, and the severity of the toxicities were graded according to the National Cancer Institute Common Terminology Criteria for Adverse Events (NCI CTCAE), version 4.03, if applicable. AE incidence was calculated using the worst CTCAE grade at every level of summarization.

**eTable 1.** List of Ethics Committees/Institutional Review Boards in the Phase 3 TAGS trial

| <b>IRB Name</b>                                                   | <b>Institution Name</b>                        | <b>City</b>   | <b>State / Province</b> | <b>Country</b> |
|-------------------------------------------------------------------|------------------------------------------------|---------------|-------------------------|----------------|
| Western Institutional Review Board                                | California Pacific Medical Center              | San Francisco | CA                      | United States  |
| Quorum Review, Inc.                                               | St. Jude Heritage Healthcare                   | Fullerton     | CA                      | United States  |
| Quorum Review, Inc.                                               | Illinois CancerCare, P.C.                      | Peoria        | IL                      | United States  |
| Mount Sinai Hospital Institutional Review Board, F404             | Mount Sinai Hospital Medical Center            | Chicago       | IL                      | United States  |
| USC IRB                                                           | USC/Norris Comprehensive Cancer Center         | Los Angeles   | CA                      | United States  |
| USC IRB                                                           | USC/Norris Comprehensive Cancer Center         | Los Angeles   | CA                      | United States  |
| Quorum Review, Inc.                                               | Banner MD Anderson                             | Gilbert       | AZ                      | United States  |
| Memorial Sloan Kettering IRB                                      | Memorial Sloan Kettering Cancer Center         | New York      | NY                      | United States  |
| Quorum Review, Inc.                                               | 21st Century Oncology                          | Jacksonville  | FL                      | United States  |
| Institutional Review Board, University of Chicago                 | University of Chicago                          | Chicago       | IL                      | United States  |
| Medical College of Wisconsin/FH IRB                               | Medical College of Wisconsin                   | Milwaukee     | WI                      | United States  |
| Quorum Review, Inc.                                               | University of Pittsburgh Medical Cancer Center | Pittsburgh    | PA                      | United States  |
| Western Institutional Review Board                                | University of Rochester Medical Center         | Rochester     | NY                      | United States  |
| Wake Forest University Health Sciences Institutional Review Board | Wake Forest Baptist Health                     | Winston-Salem | NC                      | United States  |

| <b>IRB Name</b>                                     | <b>Institution Name</b>                                        | <b>City</b>    | <b>State / Province</b> | <b>Country</b> |
|-----------------------------------------------------|----------------------------------------------------------------|----------------|-------------------------|----------------|
| Human Research Review Committee                     | Roger Williams Medical Center                                  | Providence     | RI                      | United States  |
| The NYU Institutional Review Board                  | Laura & Isaac Perlmutter Cancer Center                         | New York       | NY                      | United States  |
| The NYU Institutional Review Board                  | Laura & Isaac Perlmutter Cancer Center                         | New York       | NY                      | United States  |
| University of Kentucky Office of Research Integrity | University of Kentucky                                         | Lexington      | KY                      | United States  |
| Western Institutional Review Board                  | University of Wisconsin                                        | Madison        | WI                      | United States  |
| Alta Bates Summit IRB                               | Alta Bates Summit Comprehensive Cancer                         | Berkeley       | CA                      | United States  |
| Quorum Review, Inc.                                 | Dartmouth-Hitchcock Medical Center (DHMC)                      | Lebanon        | NH                      | United States  |
| USC IRB                                             | USC/Norris Comprehensive Cancer Center                         | Los Angeles    | CA                      | United States  |
| Quorum Review, Inc.                                 | Southern California Oncology Research Alliance (SCORA) Network | Torrance       | CA                      | United States  |
| Iwate Medical University IRB                        | Iwate Medical University                                       | Morioka-shi    | Iwate                   | Japan          |
| Tochigi Cancer Center IRB                           | Tochigi Cancer Center                                          | Utsunomiya-shi | Tochigi                 | Japan          |
| Gunma Prefectural Cancer Center                     | Gunma Prefectural Cancer Center                                | Ota-shi        | Gunma                   | Japan          |
| National Cancer Center IRB                          | National Cancer Center                                         | Kashiwa-shi    | Chiba                   | Japan          |

| <b>IRB Name</b>                            | <b>Institution Name</b>              | <b>City</b>    | <b>State / Province</b> | <b>Country</b> |
|--------------------------------------------|--------------------------------------|----------------|-------------------------|----------------|
| Clinical Research Ethical Review Committee | Ibaraki Prefectural Central Hospital | Kasama-shi     | Ibaraki                 | Japan          |
| Toyama University Hospital IRB             | Toyama University Hospital           | Toyama-shi     | Toyama                  | Japan          |
| Osaka General Medical Center IRB           | Osaka General Medical Center         | Osaka-shi      | Osaka                   | Japan          |
| Sakai City Medical Center IRB              | Sakai City Medical Center            | Sakai-shi      | Osaka                   | Japan          |
| Osaka National Hospital IRB                | Osaka National Hospital              | Osaka-shi      | Osaka                   | Japan          |
| Ethisch Comité UZA                         | University Hospital Antwerpen        | Edegem         |                         | Belgium        |
| UZ Leuven                                  | UZ Leuven                            | Leuven         |                         | Belgium        |
| GHdC                                       | Grand Hopital de Charleroi           | Charleroi      |                         | Belgium        |
| UCL St.-Luc                                | Clinique universitaire Saint Luc     | Brussels       |                         | Belgium        |
| Eticka komise VFN v Praze                  | VFN Praha                            | Praha          |                         | Czech Republic |
| Eticka komise FNHK                         | Faculty Hospital Hradec Kralove      | Hradec Králové |                         | Czech Republic |
| Eticka komise FN Olomouc                   | FN Olomouc                           | Olomouc        |                         | Czech Republic |
| Eticka komise FN u sv. Anny                | Fakultni Nemocniceu sv. Anny v Brne  | Brno           |                         | Czech Republic |
| Eticka komise nemocnice Na Homolce         | Nemocnice Na Homolce                 | Praha 5        |                         | Czech Republic |
| CPP OUEST-II                               | Centre Eugène Marquis                | RENNES CEDEX   |                         | France         |
| CPP OUEST-II                               | Centre Leon Berard                   | Lyon           |                         | France         |

| <b>IRB Name</b>                                                              | <b>Institution Name</b>                                                                 | <b>City</b>    | <b>State / Province</b> | <b>Country</b> |
|------------------------------------------------------------------------------|-----------------------------------------------------------------------------------------|----------------|-------------------------|----------------|
| CPP OUEST-II                                                                 | Centre René Gauducheau                                                                  | Saint Herblain |                         | France         |
| CPP OUEST-II                                                                 | Centre René Gauducheau                                                                  | Saint Herblain |                         | France         |
| CPP OUEST-II                                                                 | Hopital Europeen Georges Pompidou                                                       | Paris          |                         | France         |
| CPP OUEST-II                                                                 | Hopital de La                                                                           | Marseille      |                         | France         |
| CPP OUEST-II                                                                 | Centre Val D' Aurelle                                                                   | Montpellier    |                         | France         |
| CPP OUEST-II                                                                 | Hôpital Saint-Jean                                                                      | Perpignan      |                         | France         |
| CPP OUEST-II                                                                 | Groupe Hospitalier Pitié Salpêtrière                                                    | Paris Cedex 13 |                         | France         |
| CPP OUEST-II                                                                 | Hôpital Haut-                                                                           | PESSAC         |                         | France         |
| CPP OUEST-II                                                                 | Hôpital Saint Joseph                                                                    | Marseille      |                         | France         |
| Ethik-Kommission der Bayrischen Landesärztekammer                            | Städtisches Krankenhaus Muenchen Neuperlach                                             | Muenchen       |                         | Germany        |
| Ethikkommission des Landesamts fuer Gesundheit und Soziales                  | Charite Universitaetsmedizin Berlin                                                     | Berlin         |                         | Germany        |
| Ethikkommission der Universitaet Ulm                                         | Universitaetsklinikum Ulm                                                               | Ulm            | Baden-Wuerttemberg      | Germany        |
| Ethik-Kommission der MHH                                                     | Medizinische Hochschule Hannover                                                        | Hannover       |                         | Germany        |
| Ethik-Kommission der Bayrischen Landesärztekammer                            | Leopoldina-Krankenhaus                                                                  | Schweinfurt    | Bayern                  | Germany        |
| Ethikkommission der Fakultät für Medizin der Technischen Universität München | Technische Universität München                                                          | Muenchen       | Bayern                  | Germany        |
| Clinical Research Ethics Committee of the Cork Teaching Hospital             | The Adelaide and Meath Hospital, Dublin, Incorporating The National Children's Hospital | Dublin 24      |                         | Ireland        |

| <b>IRB Name</b>                                                                            | <b>Institution Name</b>                         | <b>City</b>  | <b>State / Province</b> | <b>Country</b> |
|--------------------------------------------------------------------------------------------|-------------------------------------------------|--------------|-------------------------|----------------|
| Clinical Research Ethics Committee of the Cork Teaching Hospital                           | Waterford Regional Hospital                     | Waterford    |                         | Ireland        |
| Clinical Research Ethics Committee of the Cork Teaching Hospital                           | St James Hospital                               | Dublin       |                         | Ireland        |
| COMITATO ETICO REGIONE TOSCANA - AREA VASTA NORD OVEST                                     | Azienda Ospedaliero Universitaria Pisana (AOUP) | Pisa         |                         | Italy          |
| COMITATO ETICO REGIONALE DELLA LIGURIA (SEZIONE N. 2)                                      | Azienda Ospedaliera San Martino                 | Genova       |                         | Italy          |
| COMITATO ETICO DEGLI IRCCS ISTITUTO EUROPEO DI ONCOLOGIA E CENTRO CARDIOLOGICO MONZINO     | Istituto Europeo di Oncologia (IEO)             | Milan        | Milano                  | Italy          |
| COMITATO ETICO INDIPENDENTE ISTITUTO CLINICO HUMANITAS                                     | Istituto Clinico Humanitas                      | Rozzano (MI) |                         | Italy          |
| COMITATO ETICO MILANO AREA C                                                               | A.O. Ospedale 'Niguarda Ca Granda'              | Milano       |                         | Italy          |
| COMITATO ETICO SECONDA UNIVERSITÀ DEGLI STUDI DI NAPOLI, AOU SUN - AORN OSPEDALI DEI COLLI | A.O.U. Seconda Università degli Studi di Napoli | Napoli       |                         | Italy          |
| COMITATO ETICO INDIPENDENTE CRO AVIANO IRCCS                                               | IRCCS Centro di Riferimento Oncologico – Aviano | Aviano (PN)  |                         | Italy          |

| <b>IRB Name</b>                                                                     | <b>Institution Name</b>                                                              | <b>City</b>    | <b>State / Province</b> | <b>Country</b> |
|-------------------------------------------------------------------------------------|--------------------------------------------------------------------------------------|----------------|-------------------------|----------------|
| COMITATO ETICO INTERAZIENDALE PER LE PROVINCE DI LECCO COMO E SONDRIO               | A.O. della Valtellina e della Valchiavenna Ospedale di Sondrio                       | Sondrio        |                         | Italy          |
| COMITATO ETICO AREA CREMONA MANTOVA LODI                                            | Struttura Complessa di Oncologia                                                     | Cremona        |                         | Italy          |
| COMITATO ETICO INDIPENDENTE ISTITUTO CLINICO HUMANITAS                              | Humanitas Gavazzeni                                                                  | Bergamo        |                         | Italy          |
| COMITATO ETICO UNICO REGIONALE PER LA BASILICATA                                    | A.O.R. San Carlo                                                                     | Potenza        |                         | Italy          |
| COMITATO ETICO IRST IRCCS E AVR                                                     | IRCCS - Istituto Scientifico Romagnolo Per lo Studio e la Cura Dei Tumori (I.R.S.T.) | Meldola (FC)   |                         | Italy          |
| COMITATO ETICO DELL'AZIENDA OSPEDALIERO UNIVERSITARIA SAN LUIGI GONZAGA             | A.O.U. San Luigi Gonzaga                                                             | Orbassano (TO) |                         | Italy          |
| COMITATO ETICO DELLA PROVINCIA DI BRESCIA                                           | Fondazione Poliambulanza Istituto Ospedaliero                                        | Brescia        |                         | Italy          |
| Komisja Bioetyczna przy Centrum Onkologii - Instytucie im. Marii Skłodowskiej-Curie | Maria Skłodowska-Curie Memorial Cancer Center, Institute of Oncology                 | Warszawa       |                         | Poland         |
| Komisja Bioetyczna przy Centrum Onkologii - Instytucie im. Marii Skłodowskiej-Curie | Szpital MSWiA i Warmińsko – Mazurskie Centrum Onkologii w Olsztynie                  | Olsztyn        |                         | Poland         |



| <b>IRB Name</b>                                                                     | <b>Institution Name</b>                               | <b>City</b> | <b>State / Province</b> | <b>Country</b> |
|-------------------------------------------------------------------------------------|-------------------------------------------------------|-------------|-------------------------|----------------|
| Komisja Bioetyczna przy Centrum Onkologii - Instytucie im. Marii Skłodowskiej-Curie | Szpital Uniwersytecki w Krakowie                      | Kraków      |                         | Poland         |
| Komisja Bioetyczna przy Centrum Onkologii - Instytucie im. Marii Skłodowskiej-Curie | Opolskie centrum Onkologii                            | Opole       |                         | Poland         |
| Comissão de Ética para a Investigação Clínica (CEIC)                                | Centro Hospitalar de Tras-os-Montes e Alto Douro, EPE | Vila Real   |                         | Portugal       |
| Comissão de Ética para a Investigação Clínica (CEIC)                                | Centro Hospitalar do Porto, E.P.E                     | Porto       | Porto                   | Portugal       |
| Comissão de Ética para a Investigação Clínica (CEIC)                                | Hospital Garcia de Orta, E.P.E.                       | Almada      | Setubal                 | Portugal       |
| Comissão de Ética para a Investigação Clínica (CEIC)                                | Fundação Champalimaud                                 | Lisboa      | Lisboa                  | Portugal       |
| Comissão de Ética para a Investigação Clínica (CEIC)                                | Unidade Local de Saúde de Matosinhos E.P.E.- H.       | Matosinhos  | Porto                   | Portugal       |
| Comissão de Ética para a Investigação Clínica (CEIC)                                | Centro Hospitalar de São João, EPE                    | Porto       | Porto                   | Portugal       |
| Comissão de Ética para a Investigação Clínica (CEIC)                                | Hospital da Luz, S.A.                                 | Lisboa      | Lisboa                  | Portugal       |
| Comissão de Ética para a Investigação Clínica (CEIC)                                | Instituto Português de Oncologia do Porto             | Porto       | Porto                   | Portugal       |
| Comissão de Ética para a Investigação Clínica (CEIC)                                | Hospital de Braga                                     | Braga       |                         | Portugal       |
| National Bioethics Commission of Medicine and Medical Devices                       | Spitalul Judetean "Sf Ioan Cel Nou                    | Suceava     | Suceava                 | Romania        |

| <b>IRB Name</b>                                                                  | <b>Institution Name</b>                                      | <b>City</b> | <b>State / Province</b> | <b>Country</b> |
|----------------------------------------------------------------------------------|--------------------------------------------------------------|-------------|-------------------------|----------------|
| CEIC Hospital Universitario La Paz                                               | Hospital Universitario La Paz                                | Madrid      | Madrid                  | Spain          |
| Comité de Etica dela Investigación del Principado de Asturias                    | Hospital Universitario Central de Asturias                   | Oviedo      | Asturias                | Spain          |
| CEIC IRICYS-Fundación para la Investigación Biomédica del Hospital Ramón y Cajal | Hospital Universitario Ramon y Cajal                         | Madrid      | Madrid                  | Spain          |
| CEIC del Hospital Universitario Vall d'Hebron                                    | Hospital Universitario Vall d'Hebron                         | Barcelona   | Cataluña                | Spain          |
| CEIC Hospital General Universitario "Morales Meseguer"                           | Hospital Universitario Morales Meseguer                      | Murcia      | Murcia                  | Spain          |
| Fundació Parc Taulí                                                              | Corporacio Parc                                              | Sabadell    | Cataluña                | Spain          |
| NRES Committee London-Hampstead                                                  | Sarah Cannon Research Institute                              | London      |                         | United Kingdom |
| NRES Committee London-Hampstead                                                  | Leicester Royal Infirmary                                    | Leicester   |                         | United Kingdom |
| NRES Committee London-Hampstead                                                  | Belfast Health and Social Care Trust - Belfast City Hospital | Belfast     |                         | United Kingdom |
| NRES Committee London-Hampstead                                                  | The Christie NHS Foundation Trust                            | Manchester  |                         | United Kingdom |
| NRES Committee London-Hampstead                                                  | Guy's Hospital NHS Foundation Trust                          |             |                         | United Kingdom |
| NRES Committee London-Hampstead                                                  | The Royal Marsen NHS Foundation                              |             |                         | United Kingdom |
| NRES Committee London-Hampstead                                                  | NHS Grampian                                                 |             |                         | United Kingdom |
| NRES Committee London-Hampstead                                                  | The Royal Marsen NHS Foundation                              |             |                         | United Kingdom |

| <b>IRB Name</b>                                                                                       | <b>Institution Name</b>                                                     | <b>City</b>  | <b>State / Province</b> | <b>Country</b>     |
|-------------------------------------------------------------------------------------------------------|-----------------------------------------------------------------------------|--------------|-------------------------|--------------------|
| Local Ethics Committee at Republican center for oncology and medical radiology n.a. Alexandrov        | Republican center for oncology and medical radiology n.a. Alexandrov        | Minsk region |                         | Belarus            |
| Local Ethics Committee at Minsk City Clinical Oncology Dispensary                                     | Minsk City Clinical Oncology Dispensary                                     | Minsk        |                         | Belarus            |
| Local Ethics Committee at State Institution the Republican Research Center for Radiation Medicine     | Gomel Regional Clinical Oncology Dispensary                                 | Gomel        |                         | Belarus            |
| Hadassah EC                                                                                           | Hadassah Ein Karem                                                          | Jerusalem    | -                       | Israel             |
| Rambam EC                                                                                             | Rambam healthcare campus                                                    | Haifa        | Haifa                   | Israel             |
| Sheba EC                                                                                              | Sheba Medical Center                                                        | Ramat Gan    |                         | Israel             |
| Rabin Medical Centre EC                                                                               | Rabin MC Belinson Hospital                                                  | Petah Tikva  |                         | Israel             |
| Tel Aviv Sourasky Medical Center EC                                                                   | Tel-Aviv Sourasky MC                                                        | Tel Aviv     |                         | Israel             |
| Soroka MC EC                                                                                          | Soroka MC                                                                   | Beer-Sheva   |                         | Israel             |
| Local Ethics Committee at Budget Institution of Healthcare Omsk Region - Clinical Oncology Dispensary | Budget Institution of Healthcare Omsk Region - Clinical Oncology Dispensary | Omsk         |                         | Russian Federation |

| <b>IRB Name</b>                                                                             | <b>Institution Name</b>                                                            | <b>City</b>      | <b>State / Province</b> | <b>Country</b>     |
|---------------------------------------------------------------------------------------------|------------------------------------------------------------------------------------|------------------|-------------------------|--------------------|
| Local Ethics Committee at FSBSI "N.N. Blokhin Russian Cancer Research Center"               | FSBSI "N.N. Blokhin Russian Cancer Research Center"                                | Moscow           |                         | Russian Federation |
| Local Ethics Committee at North-Western State Medical University named after I.I. Mechnikov | North-Western State Medical University named after I.I. Mechnikov Hospital         | Saint Petersburg |                         | Russian Federation |
| Local Ethics Committee at FSBSI "N.N. Blokhin Russian Cancer Research Center"               | Cancer Research Center n.a. Blokhin                                                | Moscow           |                         | Russian Federation |
| Local Ethics Committee at Republican Oncology Center                                        | Republican Oncology Center                                                         | Ufa              |                         | Russian Federation |
| Hacettepe Universitesi Tip Fakultesi Klinik Arastirmalar Etik Kurulu                        | Bezmi Alem University                                                              | Istanbul         |                         | Turkey             |
| Hacettepe Universitesi Tip Fakultesi Klinik Arastirmalar Etik Kurulu                        | Baskent University Adana Practice and Research Centre Kista Oncology Centre        | Adana            |                         | Turkey             |
| Hacettepe Universitesi Tip Fakultesi Klinik Arastirmalar Etik Kurulu                        | Marmara Uni. Pendik Training and Research Hospital                                 | Istanbul         |                         | Turkey             |
| Hacettepe Universitesi Tip Fakultesi Klinik Arastirmalar Etik Kurulu                        | Dokuz Eylul University Medical Faculty Oncology Institute Dept of Medical Oncology | Izmir            |                         | Turkey             |

| <b>IRB Name</b>                                                      | <b>Institution Name</b>                                                 | <b>City</b> | <b>State / Province</b> | <b>Country</b> |
|----------------------------------------------------------------------|-------------------------------------------------------------------------|-------------|-------------------------|----------------|
| Hacettepe Universitesi Tip Fakultesi Klinik Arastirmalar Etik Kurulu | Istanbul University, Cerrahpasa Medical Faculty                         | Istanbul    |                         | Turkey         |
| Hacettepe Universitesi Tip Fakultesi Klinik Arastirmalar Etik Kurulu | Hacettepe University Cancer Institute                                   | Ankara      |                         | Turkey         |
| Hacettepe Universitesi Tip Fakultesi Klinik Arastirmalar Etik Kurulu | Dr.Abdurrahman Yurtaslan Ankara Oncology Training and Research Hospital | Ankara      |                         | Turkey         |
| Hacettepe Universitesi Tip Fakultesi Klinik Arastirmalar Etik Kurulu | Diskapi (Yildirim Beyazit) Egitim ve Arastirma Hastanesi                | Ankara      |                         | Turkey         |
| Hacettepe Universitesi Tip Fakultesi Klinik Arastirmalar Etik Kurulu | Trakya University Medical Faculty Hospital                              | Edirne      |                         | Turkey         |
| Hacettepe Universitesi Tip Fakultesi Klinik Arastirmalar Etik Kurulu | Uludag University Medical Faculty                                       | Bursa       |                         | Turkey         |
| Hacettepe Universitesi Tip Fakultesi Klinik Arastirmalar Etik Kurulu | Ankara University Cebeci Training and Research Hospital Medical         | Ankara      |                         | Turkey         |

**eTable 2.** Baseline Demographics and Disease Characteristics of Patients Who Had or Had Not Undergone Gastrectomy<sup>a</sup>

| Characteristic                                 | Patients With Gastrectomy           |                     | Patients Without Gastrectomy        |                     |
|------------------------------------------------|-------------------------------------|---------------------|-------------------------------------|---------------------|
|                                                | Trifluridine/tipiracil<br>(n = 147) | Placebo<br>(n = 74) | Trifluridine/tipiracil<br>(n = 190) | Placebo<br>(n = 96) |
| <b>Age, y</b>                                  |                                     |                     |                                     |                     |
| Mean (SD)                                      | 63.1 (10.6)                         | 61.6 (9.9)          | 62.6 (11.0)                         | 62.4 (10.2)         |
| Median (range)                                 | 64.0 (38–89)                        | 62.0 (32–80)        | 63.0 (24–83)                        | 63.0 (32–82)        |
| <b>Sex, No. (%)</b>                            |                                     |                     |                                     |                     |
| Male                                           | 107 (72.8)                          | 49 (66.2)           | 145 (76.3)                          | 68 (70.8)           |
| <b>Body surface area, m<sup>2</sup></b>        |                                     |                     |                                     |                     |
| Mean (SD)                                      | 1.7 (0.2)                           | 1.7 (0.2)           | 1.8 (0.2)                           | 1.8 (0.2)           |
| <b>Geographic region, No. (%)</b>              |                                     |                     |                                     |                     |
| Europe                                         | 118 (80.3)                          | 57 (77.0)           | 152 (80.0)                          | 81 (84.4)           |
| Japan                                          | 22 (15.0)                           | 15 (20.3)           | 24 (12.6)                           | 12 (12.5)           |
| USA                                            | 7 (4.8)                             | 2 (2.7)             | 14 (7.4)                            | 3 (3.1)             |
| <b>ECOG PS, No. (%)</b>                        |                                     |                     |                                     |                     |
| 0                                              | 59 (40.1)                           | 30 (40.5)           | 64 (33.7)                           | 38 (39.6)           |
| 1                                              | 88 (59.9)                           | 44 (59.5)           | 126 (66.3)                          | 58 (60.4)           |
| <b>HER2 status, No. (%)</b>                    |                                     |                     |                                     |                     |
| Positive                                       | 33 (22.4)                           | 16 (21.6)           | 34 (17.9)                           | 11 (11.5)           |
| Negative                                       | 88 (59.9)                           | 40 (54.1)           | 119 (62.6)                          | 66 (68.8)           |
| Not available                                  | 26 (17.7)                           | 18 (24.3)           | 36 (18.9)                           | 19 (19.8)           |
| <b>Number of metastatic sites, No. (%)</b>     |                                     |                     |                                     |                     |
| 1–2                                            | 88 (59.9)                           | 39 (52.7)           | 67 (35.3)                           | 33 (34.4)           |
| ≥3                                             | 59 (40.1)                           | 35 (47.3)           | 123 (64.7)                          | 63 (65.6)           |
| <b>Number of prior regimens, No. (%)</b>       |                                     |                     |                                     |                     |
| 2                                              | 37 (25.2)                           | 18 (24.3)           | 89 (46.8)                           | 46 (47.9)           |
| 3                                              | 65 (44.2)                           | 22 (29.7)           | 69 (36.3)                           | 38 (39.6)           |
| ≥4                                             | 45 (30.6)                           | 34 (45.9)           | 32 (16.8)                           | 12 (12.5)           |
| <b>Prior radiotherapy,<sup>b</sup> No. (%)</b> |                                     |                     |                                     |                     |
| Curative intent                                | 44 (29.9)                           | 13 (17.6)           | 27 (14.2)                           | 13 (13.5)           |
| Palliative                                     | 28 (19.0)                           | 8 (10.8)            | 12 (6.3)                            | 1 (1.0)             |
| Palliative                                     | 18 (12.2)                           | 7 (9.5)             | 18 (9.5)                            | 12 (12.5)           |
| <b>Gastric resection status, No. (%)</b>       |                                     |                     |                                     |                     |
| Total resection                                | 95 (64.6)                           | 58 (78.4)           | --                                  | --                  |

|                   |           |           |    |    |
|-------------------|-----------|-----------|----|----|
| Partial resection | 42 (28.6) | 14 (18.9) | -- | -- |
| Unknown           | 10 (6.8)  | 2 (2.7)   | -- | -- |

Abbreviations: ECOG PS, Eastern Cooperative Oncology Group performance status; HER2, human epidermal growth factor receptor 2; SD, standard deviation.

<sup>a</sup>Intent-to-treat population.

<sup>b</sup>Some patients received both palliative and curative-intent radiotherapy.

**eTable 3.** Supportive Treatment for Hematologic Toxicities in Patients Who Had or Had Not Undergone Gastrectomy<sup>a</sup>

|                                                            | Patients With Gastrectomy<br>No. (%) |                     | Patients Without Gastrectomy<br>No. (%) |                     |
|------------------------------------------------------------|--------------------------------------|---------------------|-----------------------------------------|---------------------|
|                                                            | Trifluridine/tipiracil<br>(n = 145)  | Placebo<br>(n = 73) | Trifluridine/tipiracil<br>(n = 190)     | Placebo<br>(n = 95) |
| <b>Supportive treatment for any hematologic toxicities</b> | 51 (35.2)                            | 4 (5.5)             | 52 (27.4)                               | 8 (8.4)             |
| <b>Supportive treatment for neutropenia</b>                | 33 (22.8)                            | 1 (1.4)             | 25 (13.2)                               | 2 (2.1)             |
| G-CSF                                                      | 30 (20.7)                            | 1 (1.4)             | 24 (12.6)                               | 2 (2.1)             |
| Sodium nucleate                                            | 3 (2.1)                              | 0                   | 2 (1.1)                                 | 0                   |
| <b>Supportive treatment for anemia</b>                     | 26 (17.9)                            | 3 (4.1)             | 35 (18.4)                               | 6 (6.3)             |
| Blood cells/transfusion                                    | 25 (17.2)                            | 2 (2.7)             | 32 (16.8)                               | 6 (6.3)             |
| Erythropoietin products                                    | 1 (0.7)                              | 2 (2.7)             | 5 (2.6)                                 | 0                   |
| <b>Supportive treatment for thrombocytopenia</b>           | 2 (1)                                | 0                   | 1 (0.5)                                 | 0                   |
| Platelets                                                  | 2 (1.4)                              | 0                   | 1 (0.5)                                 | 0                   |

Abbreviations: G-CSF, granulocyte colony stimulating factor.

<sup>a</sup>As-treated population.



**eTable 4.** Treatment Exposure in Patients Who Had or Had Not Undergone Gastrectomy<sup>a</sup>

|                                                      | Patients With Gastrectomy           |                     | Patients Without Gastrectomy        |                     |
|------------------------------------------------------|-------------------------------------|---------------------|-------------------------------------|---------------------|
|                                                      | Trifluridine/tipiracil<br>(n = 145) | Placebo<br>(n = 73) | Trifluridine/tipiracil<br>(n = 190) | Placebo<br>(n = 95) |
| Mean (SD) total dose administered, mg/m <sup>2</sup> | 2160.5 (1665.2)                     | 1323.2 (712.4)      | 2101.9 (1645.3)                     | 1657.2 (1638.0)     |
| Mean (SD) dose intensity, mg/m <sup>2</sup> /week    | 145 (28)                            | 159 (23)            | 151 (25)                            | 152 (31)            |
| Mean (SD) relative dose intensity                    | 0.83 (0.16)                         | 0.91 (0.13)         | 0.86 (0.15)                         | 0.87 (0.18)         |
| Median (range) cycles initiated per patient          | 2 (1–14)                            | 2 (1–6)             | 2 (1–12)                            | 2 (1–16)            |
| Mean (SD) treatment duration, weeks                  | 12.7 (11.8)                         | 5.8 (4.4)           | 11.6 (11.2)                         | 8.1 (9.6)           |

Abbreviations: SD, standard deviation.

<sup>a</sup>As-treated population.

**eFigure 1.** Time to Deterioration of ECOG Performance Status Score to 2 or Higher in (A) Patients Who Had Undergone Gastrectomy and (B) Patients Who Had Not Undergone Gastrectomy

**A** Time to deterioration of ECOG performance status score to 2 or higher in patients with gastrectomy

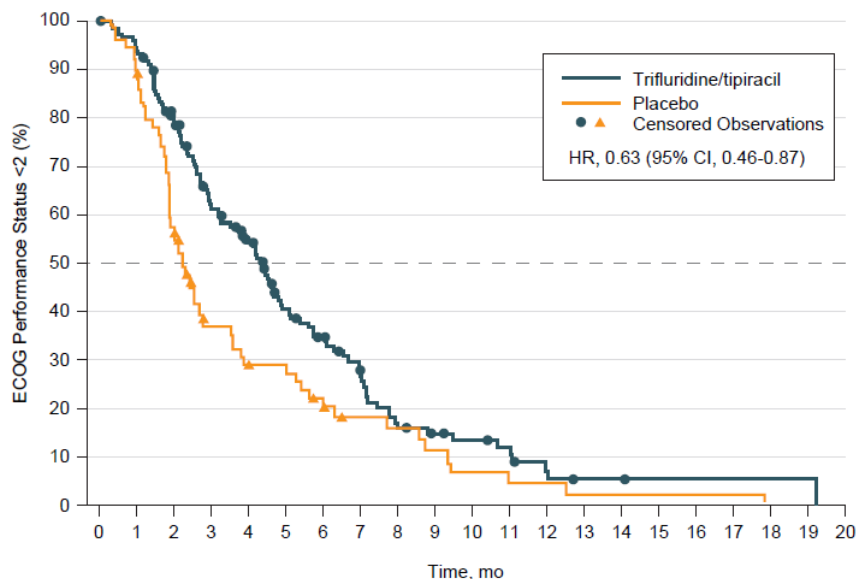

| No. at risk            |                                                         |
|------------------------|---------------------------------------------------------|
| Trifluridine/tipiracil | 147 137 111 80 66 44 36 25 15 12 10 8 4 2 2 1 1 1 1 1 0 |
| Placebo                | 74 66 41 23 17 16 11 8 7 5 3 2 2 1 1 1 1 1 1 0          |

**B** Time to deterioration of ECOG performance status score to 2 or higher in patients without gastrectomy

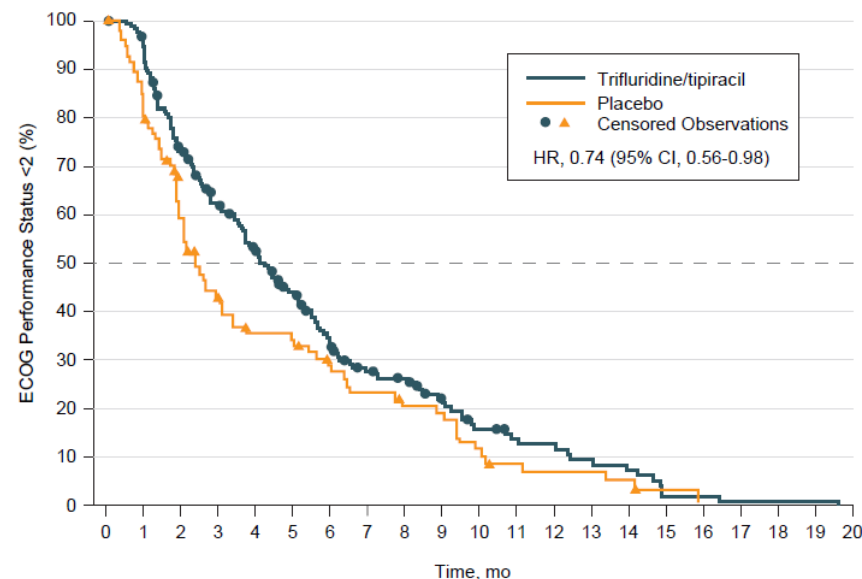

| No. at risk            |                                                            |
|------------------------|------------------------------------------------------------|
| Trifluridine/tipiracil | 190 171 134 107 87 68 49 38 34 24 17 13 12 8 7 2 2 1 1 1 0 |
| Placebo                | 96 76 53 35 28 26 21 17 14 13 7 5 4 4 3 1 0                |

Median times to deterioration of ECOG performance status scores were assessed using the Kaplan–Meier method. In patients with gastrectomy (A), the median time to deterioration was 4.4 months (95% CI, 3.3–4.8) in the trifluridine/tipiracil group and 2.2 months (95% CI, 1.9–2.8) in the placebo group. In patients without gastrectomy (B), the median time to deterioration was 4.2 months (95% CI, 3.6–5.1) in the trifluridine/tipiracil group and 2.4 months (95% CI, 1.9–3.1) in the placebo group. CI indicates confidence interval; ECOG, Eastern Cooperative Oncology Group; HR, hazard ratio.

**eResults.** Hematologic AEs in FTD/TPI-treated Patients Who Had or Had Not Received Prior Irradiation

In the gastrectomy subgroup, incidences of neutropenia and anemia were 54.4% (24 of 44 patients) and 40.9% (18 of 44 patients), respectively, among patients who had undergone prior radiotherapy and 62.4% (63 of 101 patients) and 58.4% (59 of 101 patients) among those who had not undergone radiotherapy. In the no-gastrectomy subgroup, incidences of neutropenia and anemia were 33.3% (9 of 27 patients) and 25.9% (7 of 27 patients), respectively, among patients who had undergone prior radiotherapy and 49.1% (80 of 163 patients) and 40.5% (66 of 163 patients) among those who had not undergone radiotherapy.
