# Supplementary material for: Efficacy and Safety of Trifluridine/Tipiracil Treatment in Patients With Metastatic Gastric Cancer Who Had Undergone Gastrectomy: Subgroup Analyses of a Randomized Clinical Trial
Source: PubMed Central journal article supplement — JAMA Oncol. 2019 Oct 10;6(1):e193531. doi: 10.1001/jamaoncol.2019.3531 (PMC6802061; doi:10.1001/jamaoncol.2019.3531), 2019-10-10
Supplement: jamaoncol-6-e193531-s003.pdf [file jamaoncol-6-e193531-s003.pdf]

## Data Sharing Statement

Iison. Efficacy and Safety of Trifluridine/Tipiracil Treatment in Patients With Metastatic Gastric Cancer Who Had Undergone Gastrectomy.

*JAMA Oncol.* Published October 10, 2019.

10.1001/jamaoncol.2019.3531

### Data

**Data available:** No

### Additional Information

**Explanation for why data not available:** Data generated or analyzed during this study are on file with Taiho Oncology, Inc. and Taiho Pharmaceuticals, Co., Ltd. and are not publicly available. Inquiries about data access should be sent to [toiawase@taiho.co.jp](mailto:toiawase@taiho.co.jp).
